# Supplementary material for: In Vitro Susceptibility of Multi-Drug Resistant Klebsiella pneumoniae Strains Causing Nosocomial Infections to Fosfomycin. A Comparison of Determination Methods
Source: MDPI journal article supplement (doi:10.3390/pathogens10050512), 2021-04-23
Supplement: s1 [file s1]

**Table S1.** List of *Klebsiella pneumoniae* strains isolated in different hospital centers.

| Strain number                                                               | Initials | Sex | Material                   | Date of isolation | Branch                                                              |
|-----------------------------------------------------------------------------|----------|-----|----------------------------|-------------------|---------------------------------------------------------------------|
| <b>A. Isolated strains in Lower Silesian Specialist Hospital in Wrocław</b> |          |     |                            |                   |                                                                     |
| 1                                                                           | M.S.     | M   | Urine                      | 22.09.2019        | Orthopaedic Trauma Surgery Department                               |
| 2                                                                           | K.K.     | F   | Urine                      | 20.09.2019        | Department of Cardiology                                            |
| 3                                                                           | M.W-S.   | F   | Bronchial aspirate         | 22.09.2019        | Department of Toxicology and Internal Diseases                      |
| 4                                                                           | W.T.     | F   | Urine                      | 28.09.2019        | Department of Urology and Oncological Urology                       |
| 5                                                                           | J.W.     | M   | Urine                      | 29.09.2019        | Department of Anaesthesiology and Intensive Care                    |
| 6                                                                           | M.R.     | F   | Urine                      | 01.10.2019        | Department of Internal Diseases                                     |
| 7                                                                           | B.W-P.   | M   | Urine                      | 01.10.2019        | Department of Neurology with Stroke Subdivision                     |
| 8                                                                           | B.P.     | M   | Bronchial aspirate         | 09.10.2019        | Department of Neurology with Stroke Subdivision                     |
| 9                                                                           | M.J.     | F   | Bronchial aspirate         | 11.10.2019        | Department of Anaesthesiology and Intensive Care                    |
| 10                                                                          | J.K.     | F   | Urine                      | 31.03.2017        | Orthopaedic Trauma Surgery Department                               |
| 11                                                                          | S. J     | M   | Bronchial aspirate         | 10.05.2017        | Department of Anaesthesiology and Intensive Care                    |
| 12                                                                          | A.S.     | M   | Bronchial aspirate         | 19.05.2017        | Department of Anaesthesiology and Intensive Care                    |
| 13                                                                          | B.W-L.   | F   | CSF                        | 14.08.2017        | Department of Neurology with Stroke Subdivision                     |
| 14                                                                          | R.A      | F   | Urine                      | 12.01.2018        | Department of Internal Diseases                                     |
| 15                                                                          | I. D     | F   | Urine                      | 21.01.2018        | Department of Internal Diseases                                     |
| 16                                                                          | R.W.     | F   | Feces (carrier)            | 16.01.2018        | Department of Internal Diseases                                     |
| 17                                                                          | W.P.     | M   | Urine                      | 09.11.2019        | Department of Neurochirurgii                                        |
| 18                                                                          | I.U.     | M   | Bronchial aspirate         | 09.11.2019        | Department of Anaesthesiology and Intensive Care                    |
| 19                                                                          | T.K.     | M   | Urine                      | 31.10.2019        | Orthopaedic Trauma Surgery Department                               |
| 20                                                                          | G.D      | F   | Urine                      | 16.11.2019        | Department of Cardiology                                            |
| 21                                                                          | M.M      | F   | Blood                      | 04.11.2019        | Department of Neurology with Stroke Subdivision                     |
| 22                                                                          | A.K.     | F   | Blood                      | 22.02.2020        | Department of Anaesthesiology and Intensive Care                    |
| 23                                                                          | B.M.     | F   | Bronchial aspirate         | 28.02.2020        | Department of Anaesthesiology and Intensive Care                    |
| 24                                                                          | I.K.     | F   | Bronchial aspirate         | 04.03.2020        | Department of Anaesthesiology and Intensive Care                    |
| <b>B. Isolated strains in the Regional Specialist Hospital in Wrocław</b>   |          |     |                            |                   |                                                                     |
| Strain number                                                               | Initials | Sex | Material                   | Date of isolation | Branch                                                              |
| 25                                                                          | W.M.     | M   | Abdominal flushes          | 11.2017           | Department of Infectious Diseases                                   |
| 26                                                                          | S.G.     | M   | Feces (carrier)            | 11.2017           | Department of Infectious Diseases                                   |
| 27                                                                          | M.W.     | F   | Feces (carrier)            | 11.2017           | Department of Infectious Diseases                                   |
| <b>C. Isolated strains in the Regional Specialist Hospital in Legnica</b>   |          |     |                            |                   |                                                                     |
| Strain number                                                               | Initials | Sex | Material                   | Date of isolation | Branch                                                              |
| 28                                                                          | Z.B.     | F   | Purulent mite swab (wound) | 11.2017           | Haematological Department                                           |
| 29                                                                          | S.K.     | M   | Feces (carrier)            | 12.2017           | Department of InternalDiseases                                      |
| <b>D. Isolated strains at the University Clinical Hospital in Wrocław</b>   |          |     |                            |                   |                                                                     |
| Strain number                                                               | Initials | Sex | Material                   | Date of isolation | Branch                                                              |
| 30                                                                          | M.W.     | M   | Urine                      | 18.10.2017        | Clinic of Hematology, Blood Cancers and Bone Marrow Transplantation |
| 31                                                                          | P. S.    | M   | Blood                      | 25.05.2014        | Clinic of Hematology, Blood Cancers and Bone Marrow Transplantation |
| 32                                                                          | K.K.     | M   | Feces (carrier)            | 30.01.2015        | Clinic of Hematology, Blood Cancers and Bone Marrow Transplantation |
| 33                                                                          | B.A.     | F   | Feces (carrier)            | 17.11.2014        | Clinic of Hematology, Blood Cancers and Bone Marrow Transplantation |
| 34                                                                          | K.w.     | M   | Feces (carrier)            | 20.05.2014        | Clinic of Hematology, Blood Cancers and Bone Marrow Transplantation |
| 35                                                                          | W.M.     | M   | Urine                      | 03.11.2011        | Clinic of Hematology, Blood Cancers and Bone Marrow Transplantation |
| 36                                                                          | M.U.     | F   | Feces (carrier)            | 05.06.2014        | Clinic of Hematology, Blood Cancers and Bone Marrow Transplantation |
| 37                                                                          | L.T.     | M   | Feces (carrier)            | 11.06.2013        | Clinic of Hematology, Blood Cancers and Bone Marrow Transplantation |
| 38                                                                          | P.M.     | M   | Feces (carrier)            | 12.10.2013        | Clinic of Hematology, Blood Cancers and Bone Marrow Transplantation |
| 39                                                                          | A.J.     | F   | Spit                       | 16.01.2014        | Clinic of Hematology, Blood Cancers and Bone Marrow Transplantation |
| 40                                                                          | D.A.     | F   | Feces (carrier)            | 27.02.2014        | Clinic of Hematology, Blood Cancers and Bone Marrow Transplantation |
| 41                                                                          | Z.B.     | M   | Purulent mite swab (wound) | 13.05.2019        | Clinic of General Surgery and Oncological Surgery                   |
| 42                                                                          | S.M.     | M   | Urine                      | 09.05.2017        | Department of Anaesthesiology and Intensive Care                    |
| 43                                                                          | P.Z.     | F   | Feces (carrier)            | 21.09.2016        | Clinic of Hematology, Blood Cancers and Bone Marrow Transplantation |

**Table S2.** Results of determination of resistance mechanisms in *Klebsiella* strains.

| Strain number | ESBL | MBL | KPC | Susceptibility to fosfomycin in reference methods |
|---------------|------|-----|-----|---------------------------------------------------|
| 1A            | +    | -   | -   | R                                                 |
| 2A            | +    | -   | -   | S                                                 |
| 3A            | +    | -   | -   | S                                                 |
| 4A            | +    | -   | -   | R                                                 |
| 5A            | +    | -   | -   | S                                                 |
| 6A            | +    | -   | -   | R                                                 |
| 7A            | +    | -   | -   | S                                                 |
| 8A            | +    | +   | -   | R                                                 |
| 9A            | +    | -   | -   | S                                                 |
| 10A           | +    | -   | -   | S                                                 |
| 11A           | +    | -   | -   | S                                                 |
| 12A           | +    | -   | -   | S                                                 |
| 13A           | +    | -   | -   | S                                                 |
| 14A           | +    | +   | -   | S                                                 |
| 15A           | +    | +   | -   | R                                                 |
| 16A           | +    | +   | -   | S                                                 |
| 17A           | +    | +   | -   | S                                                 |
| 18A           | +    | -   | -   | S                                                 |
| 19A           | +    | -   | -   | S                                                 |
| 20A           | +    | +   | -   | S                                                 |
| 21A           | +    | -   | -   | S                                                 |
| 22A           | +    | +   | -   | S                                                 |
| 23A           | +    | +   | -   | S                                                 |
| 24A           | +    | +   | -   | S                                                 |
| 25B           | +    | +   | -   | R                                                 |
| 26B           | +    | +   | -   | R                                                 |
| 27B           | +    | +   | -   | R                                                 |
| 28C           | +    | +   | -   | S                                                 |
| 29C           | +    | +   | -   | S                                                 |
| 20%           | +    | -   | +   | R                                                 |
| 31D           | +    | -   | -   | S                                                 |
| 32D           | +    | -   | -   | R                                                 |
| 33D           | +    | -   | +   | R                                                 |
| 34D           | +    | +   | -   | S                                                 |
| 35D           | +    | -   | +   | R                                                 |
| 36D           | +    | -   | -   | S                                                 |
| 37D           | +    | -   | +   | R                                                 |
| 38D           | +    | -   | -   | R                                                 |
| 39D           | +    | -   | -   | S                                                 |
| 40D           | +    | -   | -   | S                                                 |
| 41D           | +    | -   | -   | R                                                 |
| 42D           | +    | -   | -   | S                                                 |
| 43D           | +    | +   | -   | S                                                 |

**Table S3.** The results of *Klebsiella* fosfomycin susceptibility study with the MIC value, determined by different methods.

| Strain Number    | 1A  | 2A   | 3A  | 4A  | 5A  | 6A  | 7A   | 8A    | 9A  | 10A | 11A | 12A | 13A | 14A |     |
|------------------|-----|------|-----|-----|-----|-----|------|-------|-----|-----|-----|-----|-----|-----|-----|
| Reference Method | R   | S    | S   | R   | S   | R   | S    | R     | S   | S   | S   | S   | S   | S   |     |
|                  | 128 | 32   | 32  | 128 | 8   | 256 | 16   | >512  | 16  | 32  | 32  | 32  | 32  | 4   |     |
| E-test           | R   | S    | S   | R   | S   | R   | S    | R     | S   | S   | S   | S   | S   | S   |     |
|                  | 96  | 32   | 24  | 64  | 3   | 256 | 6    | 1064  | 6   | 24  | 32  | 32  | 24  | 16  |     |
| Phoenix          | S   | S    | S   | S   | S   | S   | S    | R     | S   | S   | S   | S   | S   | R   |     |
|                  | ≤16 | ≤16  | ≤16 | ≤16 | ≤16 | ≤16 | ≤16  | >64   | ≤16 | ≤16 | ≤16 | ≤16 | ≤16 | >64 |     |
| Strain Number    | 15A | 16A  | 17A | 18A | 19A | 20A | 21A  | 22A   | 23A | 24A | 25B | 26B | 27B | 28C |     |
| Reference Method | R   | S    | S   | S   | S   | S   | S    | S     | S   | S   | R   | R   | R   | S   |     |
|                  | 128 | 32   | 16  | 32  | 32  | 32  | 32   | 1     | 32  | 32  | 128 | 64  | 128 | 32  |     |
| E-test           | R   | S    | S   | S   | S   | S   | S    | S     | S   | S   | R   | R   | R   | S   |     |
|                  | 96  | 24   | 6   | 24  | 16  | 24  | 24   | 0,064 | 12  | 24  | 64  | 64  | 64  | 16  |     |
| Phoenix          | R   | S    | S   | S   | S   | S   | S    | S     | S   | S   | S   | R   | S   | S   |     |
|                  | >64 | ≤16  | ≤16 | ≤16 | ≤16 | ≤16 | ≤16  | 16    | ≤16 | ≤16 | ≤16 | 64  | ≤16 | ≤16 |     |
| Strain Number    | 29C | 20%  | 31D | 32D | 33D | 34D | 35D  | 36D   | 37D | 38D | 39D | 40D | 41D | 42D | 43D |
| Reference Method | S   | R    | S   | R   | R   | S   | R    | S     | R   | R   | S   | S   | R   | S   | S   |
|                  | 32  | >512 | 32  | 256 | 128 | 32  | >512 | 32    | 512 | 256 | 32  | 32  | 256 | 32  | 32  |
| E-test           | S   | R    | S   | R   | R   | S   | R    | S     | R   | R   | S   | S   | R   | S   | S   |
|                  | 16  | 256  | 16  | 256 | 64  | 12  | 1064 | 24    | 256 | 192 | 32  | 24  | 256 | 12  | 16  |
| Phoenix          | S   | R    | S   | R   | R   | S   | R    | R     | R   | R   | S   | S   | R   | S   | S   |
|                  | 32  | 64   | ≤16 | >64 | 64  | ≤16 | >64  | >64   | >64 | 64  | 32  | ≤16 | 64  | ≤16 | ≤16 |

S—susceptible, R—resistant, numerical values—MIC in µg/mL.

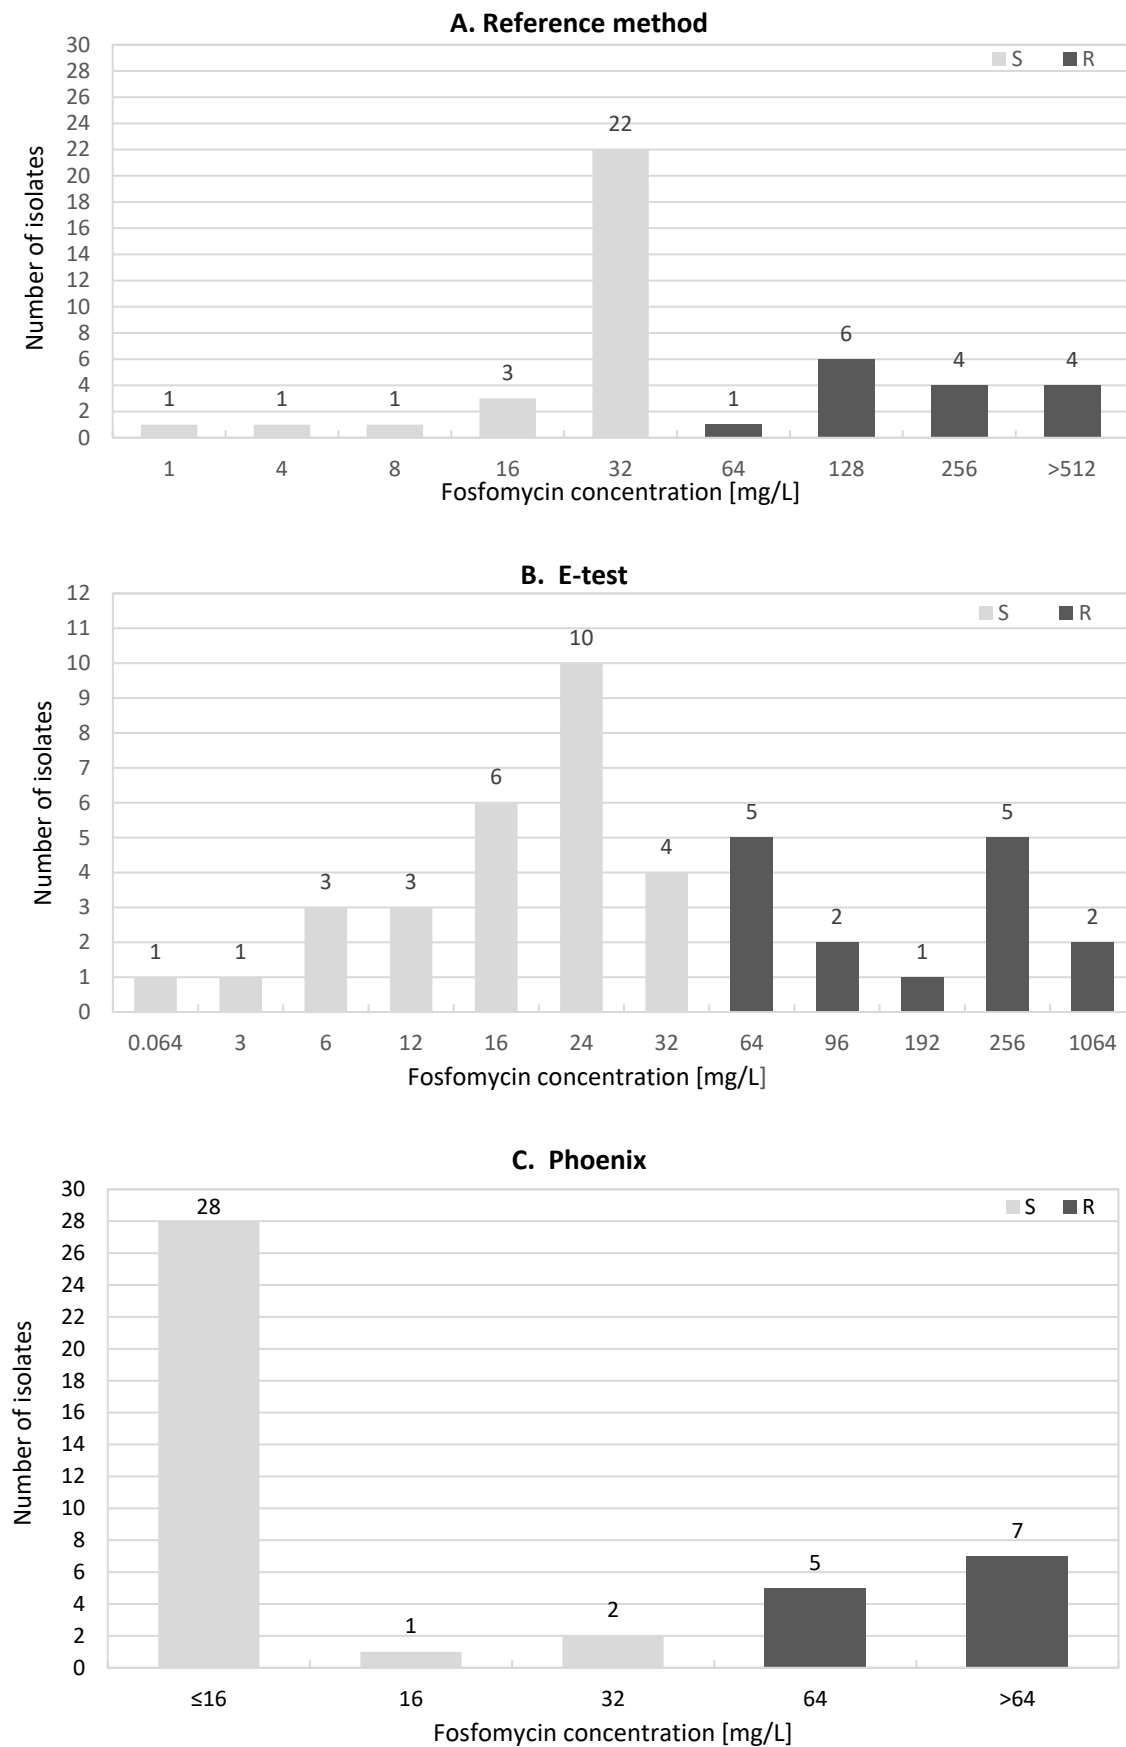

**Figure S1.** MIC distribution of fosfomycin for tested *Klebsiella pneumoniae* strains; S—susceptible, R—resistant in different methods: (A) Reference method; (B) E-test; (C) Phoenix.
